# Supplementary figures and images for: Effect of carbon chain length on the hydrolysis and transport characteristics of alkyl gallates in rat intestine
Source: Royal Society of Chemistry journal article supplement (doi:10.1039/d1fo01732b), 2021-01-01

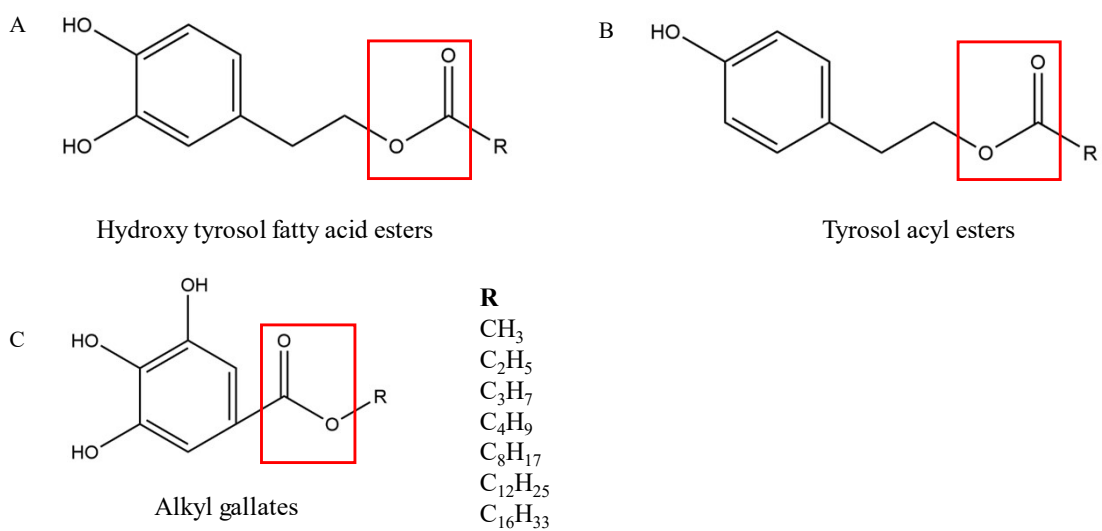

Fig.1S Structures of hydroxytyrosol acyl esters (A), tyrosol acyl esters (B) and alkyl gallates (C).

Supplement: d1fo01732b2.pdf [file d1fo01732b2.pdf]

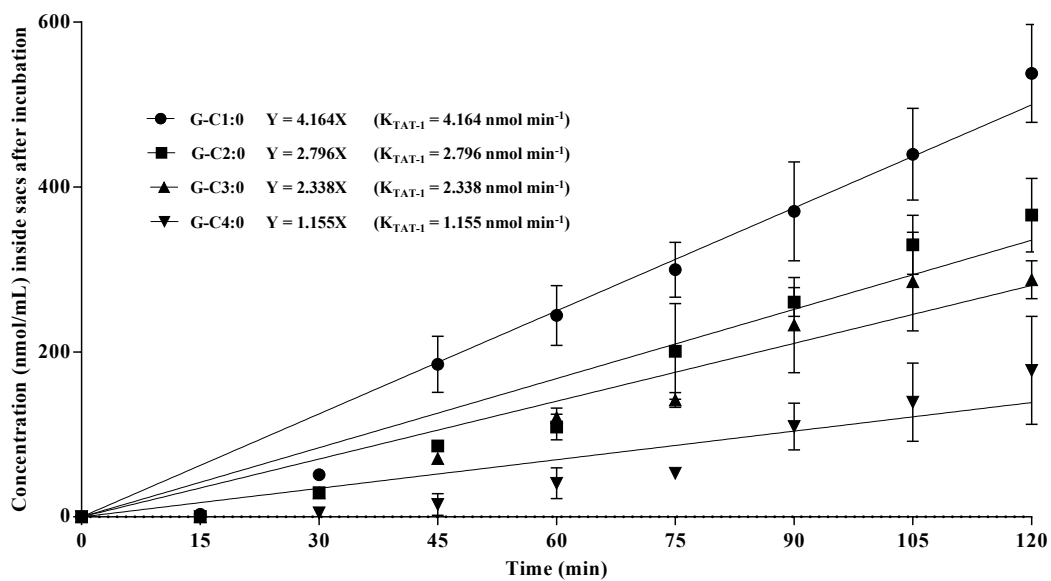

Fig.2S Kinetic model for the transportation of A-GAs from mucosal to serosal side of everted sacs.

Supplement: d1fo01732b3.pdf [file d1fo01732b3.pdf]

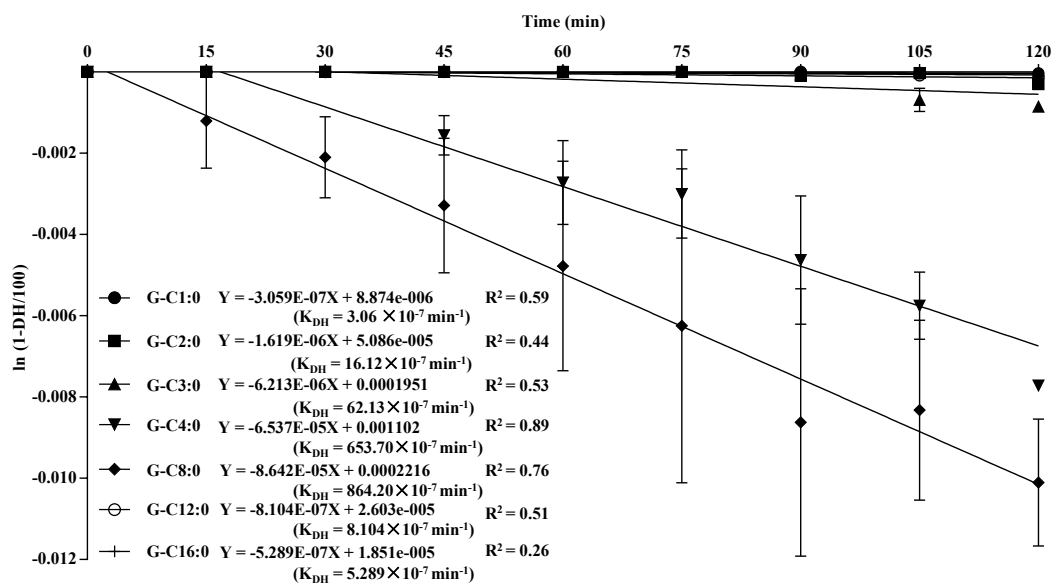

Fig.3S Kinetic model for the hydrolysis of A-GAs by everted-rat-gut sacs model.

Supplement: d1fo01732b4.pdf [file d1fo01732b4.pdf]

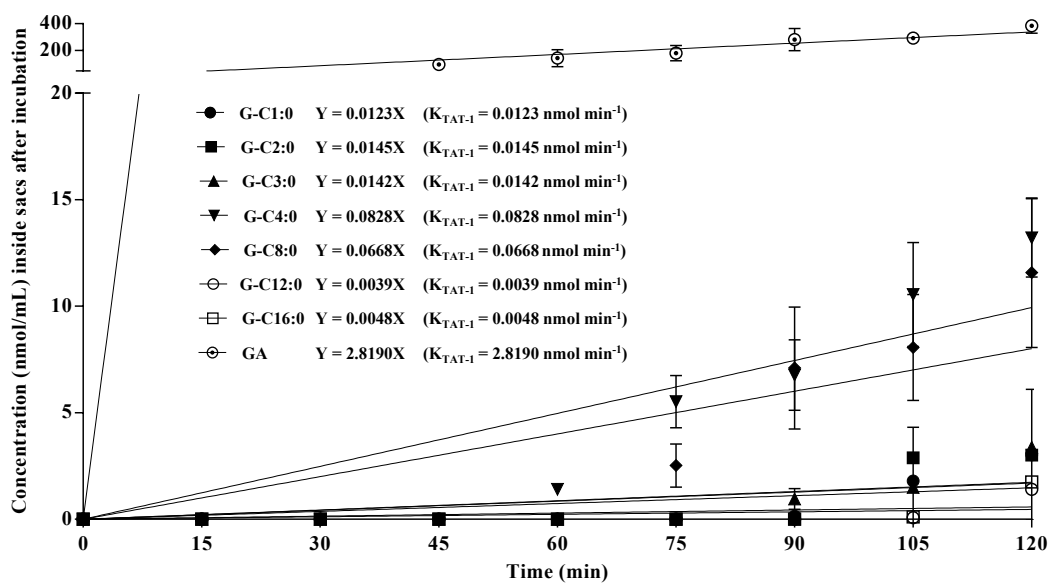

Fig.4S Kinetic model for the transportation of GA from mucosal to serosal side of everted sacs.

Supplement: d1fo01732b5.pdf [file d1fo01732b5.pdf]
